# Supplementary material for: µ-Conotoxins Modulating Sodium Currents in Pain Perception and Transmission: A Therapeutic Potential
Source: MDPI journal article supplement (doi:10.3390/md15100295), 2017-09-22
Supplement: s1 [file s1]

# Supplementary Materials: $\mu$ -Conotoxins Modulating Sodium Currents in Pain Perception and Transmission: A Therapeutic Potential

Elisabetta Tosti, Raffaele Boni and Alessandra Gallo

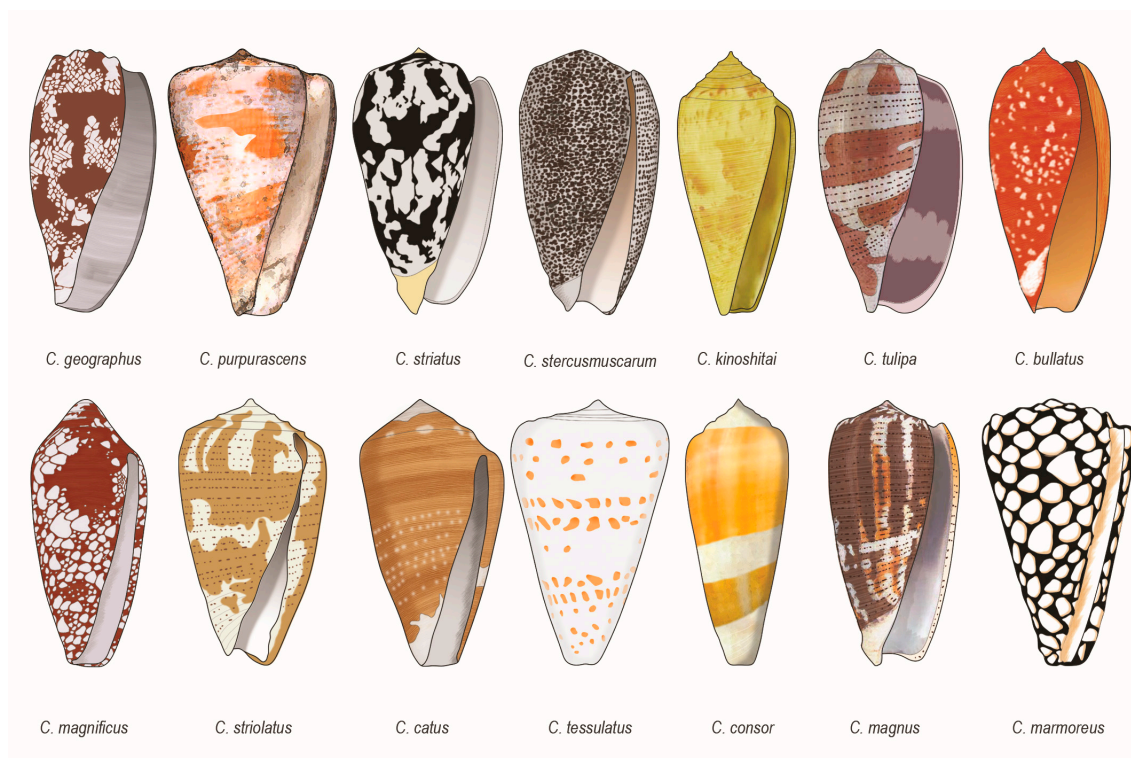

Figure S1. Different species of Conus genus.
